# Supplementary material for: Assessing the Sensitivity of Aerosol Mass Budget and Effective Radiative Forcing to Horizontal Grid Spacing in E3SMv1 Using A Regional Refinement Approach
Source: Copernicus journal article supplement (doi:10.5194/gmd-2023-73), 2023-09-08
Supplement: Supplementary file 1 [file gmd-2023-73-supplement.pdf]

1 Supplementary information for

2 Assessing the Sensitivity of Aerosol Mass Budget and  
3 Effective Radiative Forcing to Horizontal Grid Spacing in  
4 E3SMv1 Using A Regional Refinement Approach

5 Jianfeng Li<sup>1, \*</sup>, Kai Zhang<sup>1, \*</sup>, Taufiq Hassan<sup>1</sup>, Shixuan Zhang<sup>1</sup>, Po-Lun Ma<sup>1</sup>, Balwinder Singh<sup>1</sup>,  
6 Qiyang Yan<sup>1, a</sup>, Huilin Huang<sup>1</sup>

7 <sup>1</sup>Atmospheric Sciences and Global Change Division, Pacific Northwest National Laboratory,  
8 Richland, Washington, US

9 <sup>a</sup>now at KLA Corporation, US

10  
11 \* Correspondence to Jianfeng Li (jianfeng.li@pnnl.gov) and Kai Zhang (Kai.Zhang@pnnl.gov)

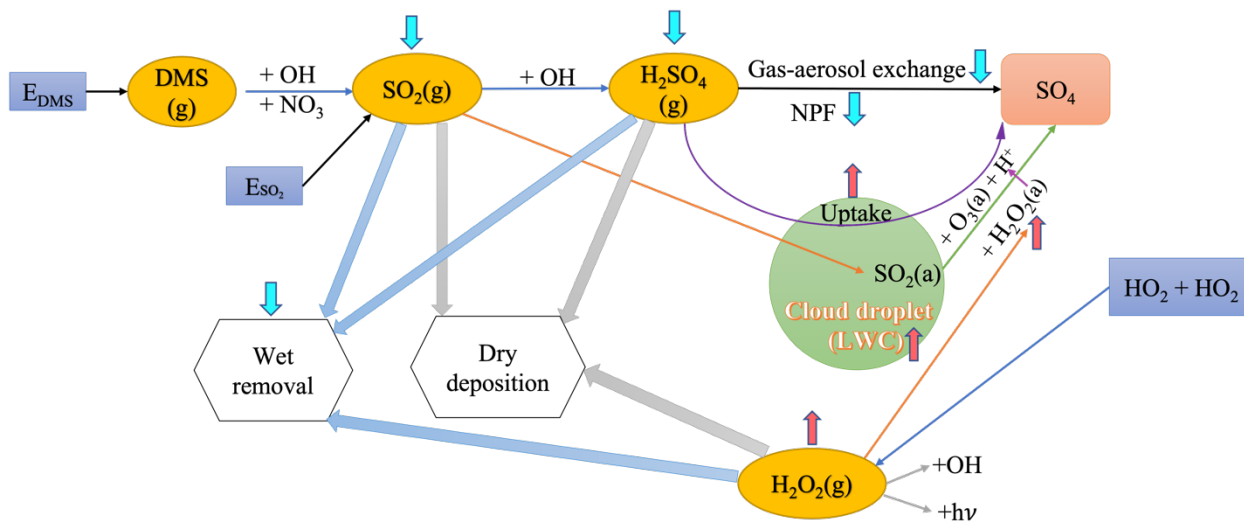

13  
 14 Figure S1. Schematic of the impact of RRM on sulfur chemistry. Red upward arrows indicate  
 15 enhancement by RRM, while cyan downward arrows denote reduction by RRM.  
 16

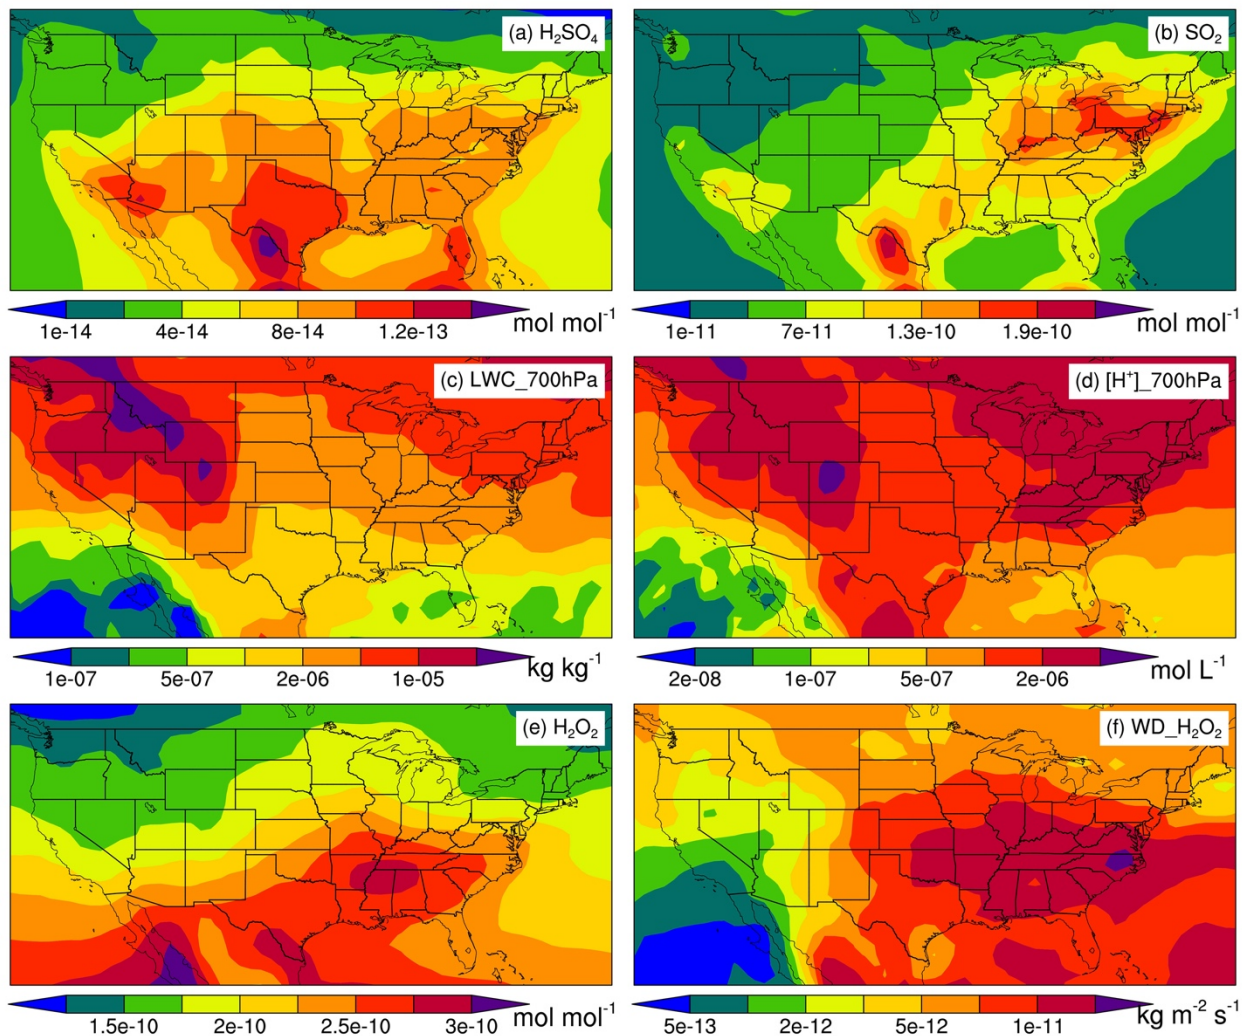

17  
 18 Figure S2. Spatial distributions of the annual mean (a) vertical-integrated gas-phase H<sub>2</sub>SO<sub>4</sub>  
 19 concentrations, (b) vertical-integrated gas-phase SO<sub>2</sub> concentrations, (c) large-scale cloud liquid water  
 20 content at 700 hPa ( $\text{kg}_{\text{water}} \text{kg}_{\text{air}}^{-1}$ ), (d) H<sup>+</sup> concentrations in large-scale cloud liquid water at 700 hPa, (e)  
 21 vertical-integrated gas-phase H<sub>2</sub>O<sub>2</sub> concentrations, and (f) wet deposition fluxes of gas-phase H<sub>2</sub>O<sub>2</sub> from  
 22 the LR simulation.  
 23

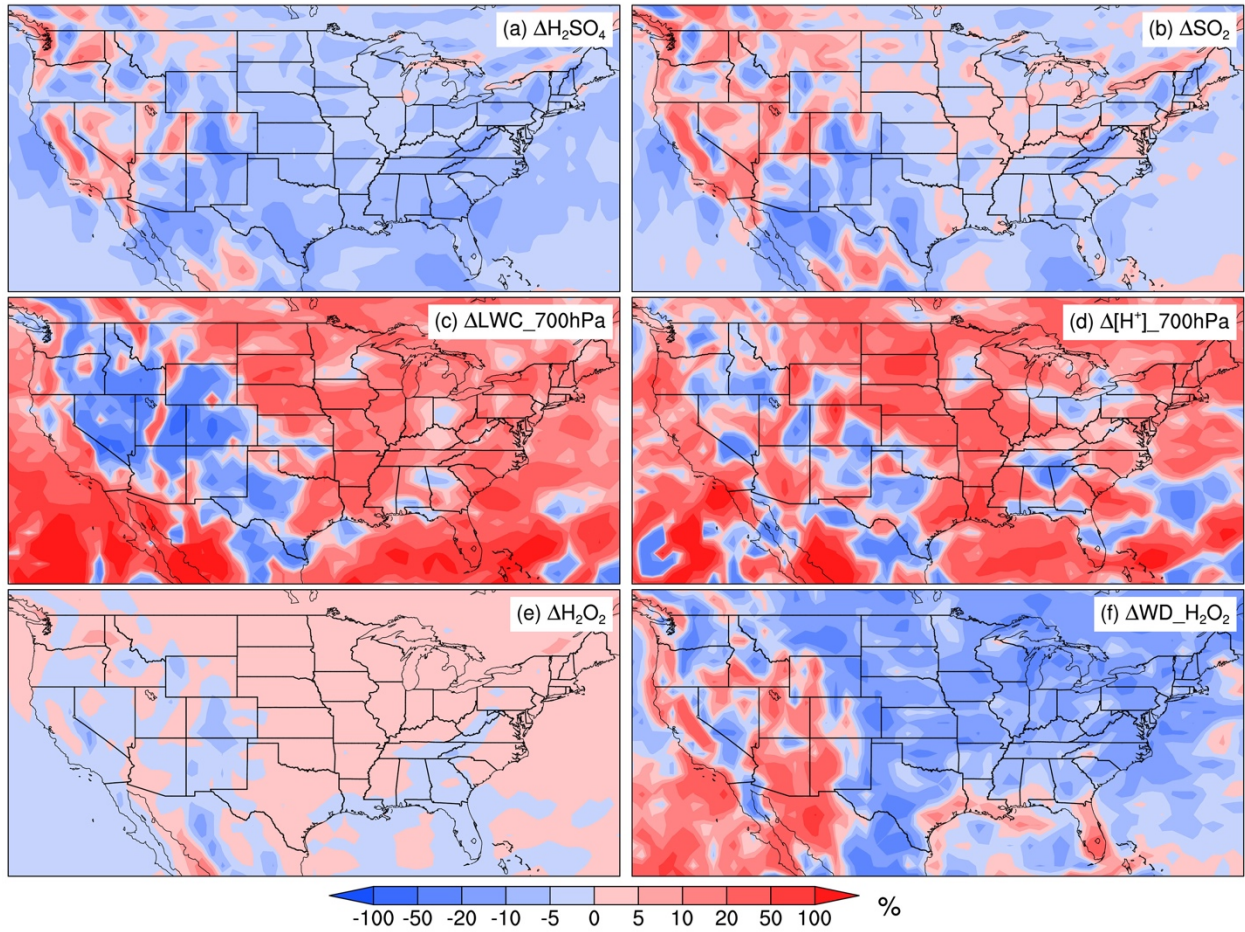

24  
25  
26

Figure S3. The same as Figure S2 but for the relative differences between the RRM and LR simulations.

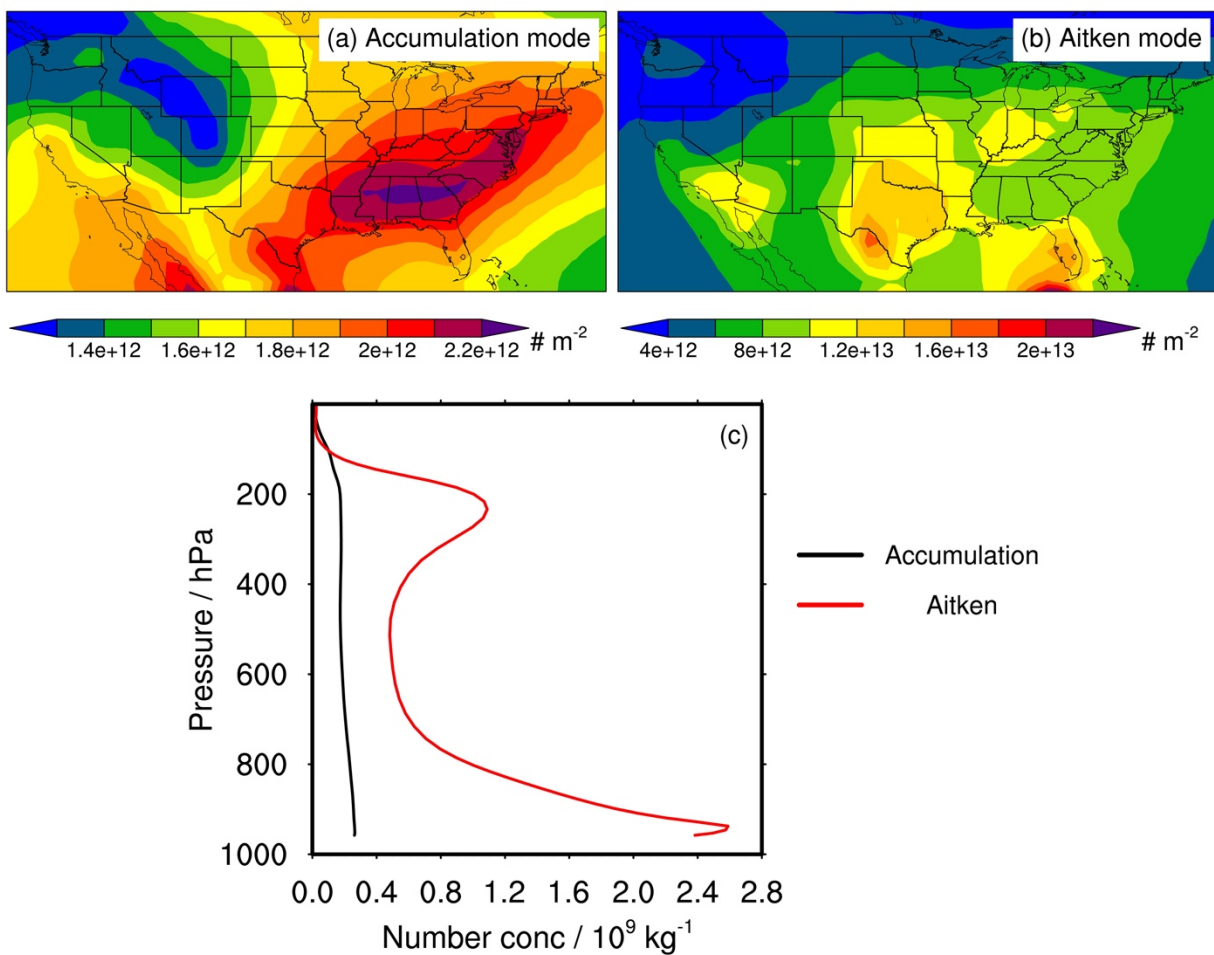

27  
 28 Figure S4. (a, b) Spatial distributions of annual mean vertical-integrated IAP number concentrations ( $\# \text{ m}^{-2}$ ) for (a) accumulation and (b) Aitken modes from the LR simulation. (c) Vertical profiles of annual  
 29 regional mean IAP number concentrations ( $10^9 \text{ kg}_{\text{air}}^{-1}$ ) for accumulation and Aitken modes from the LR  
 30 simulation.  
 31  
 32

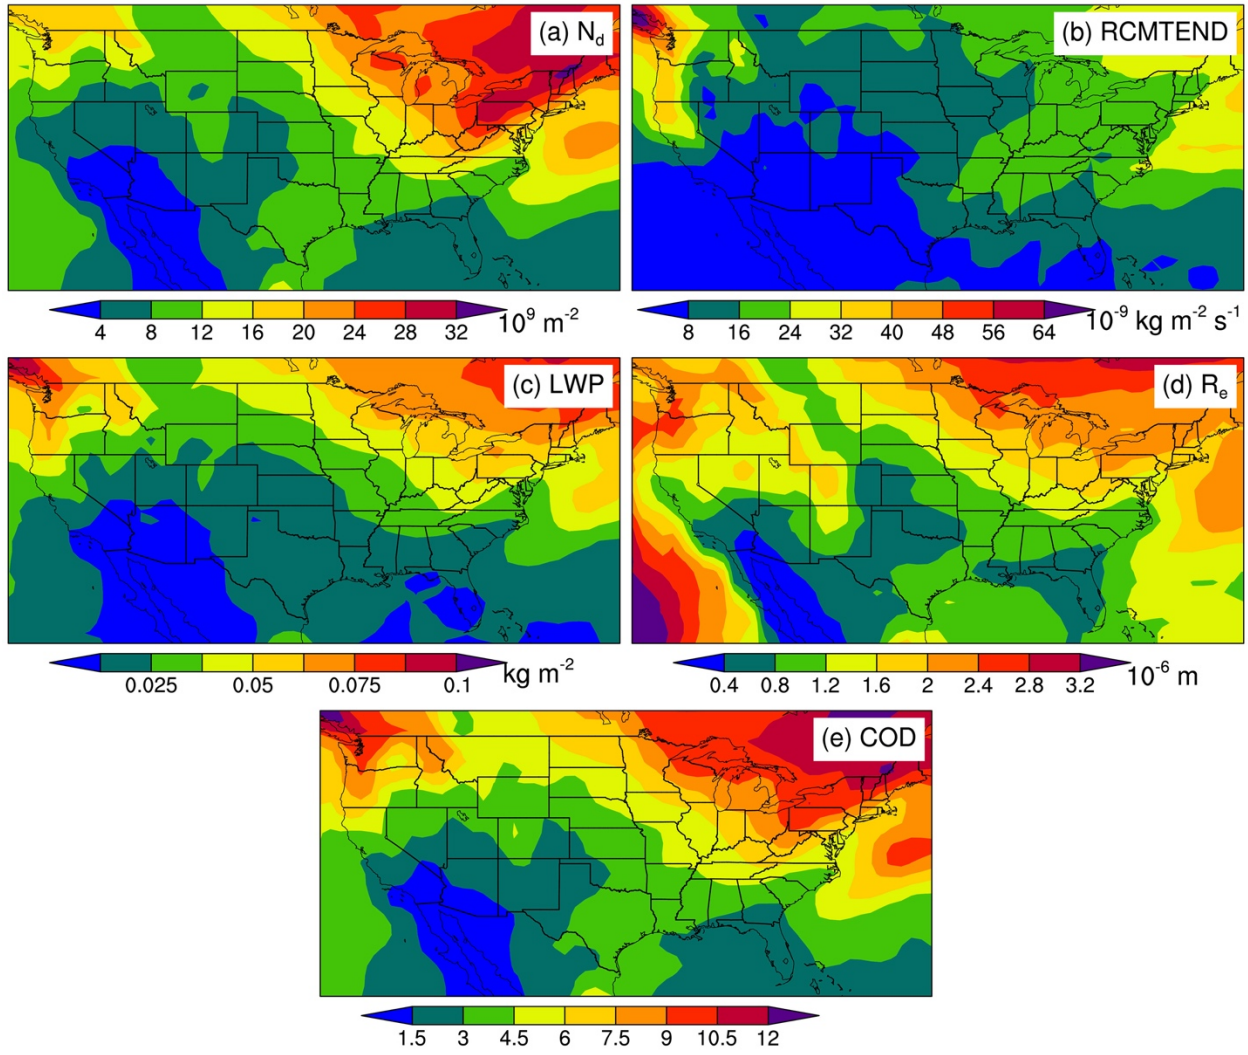

33  
34  
35

Figure S5. Same as Figure 12 but for the LR simulation results.

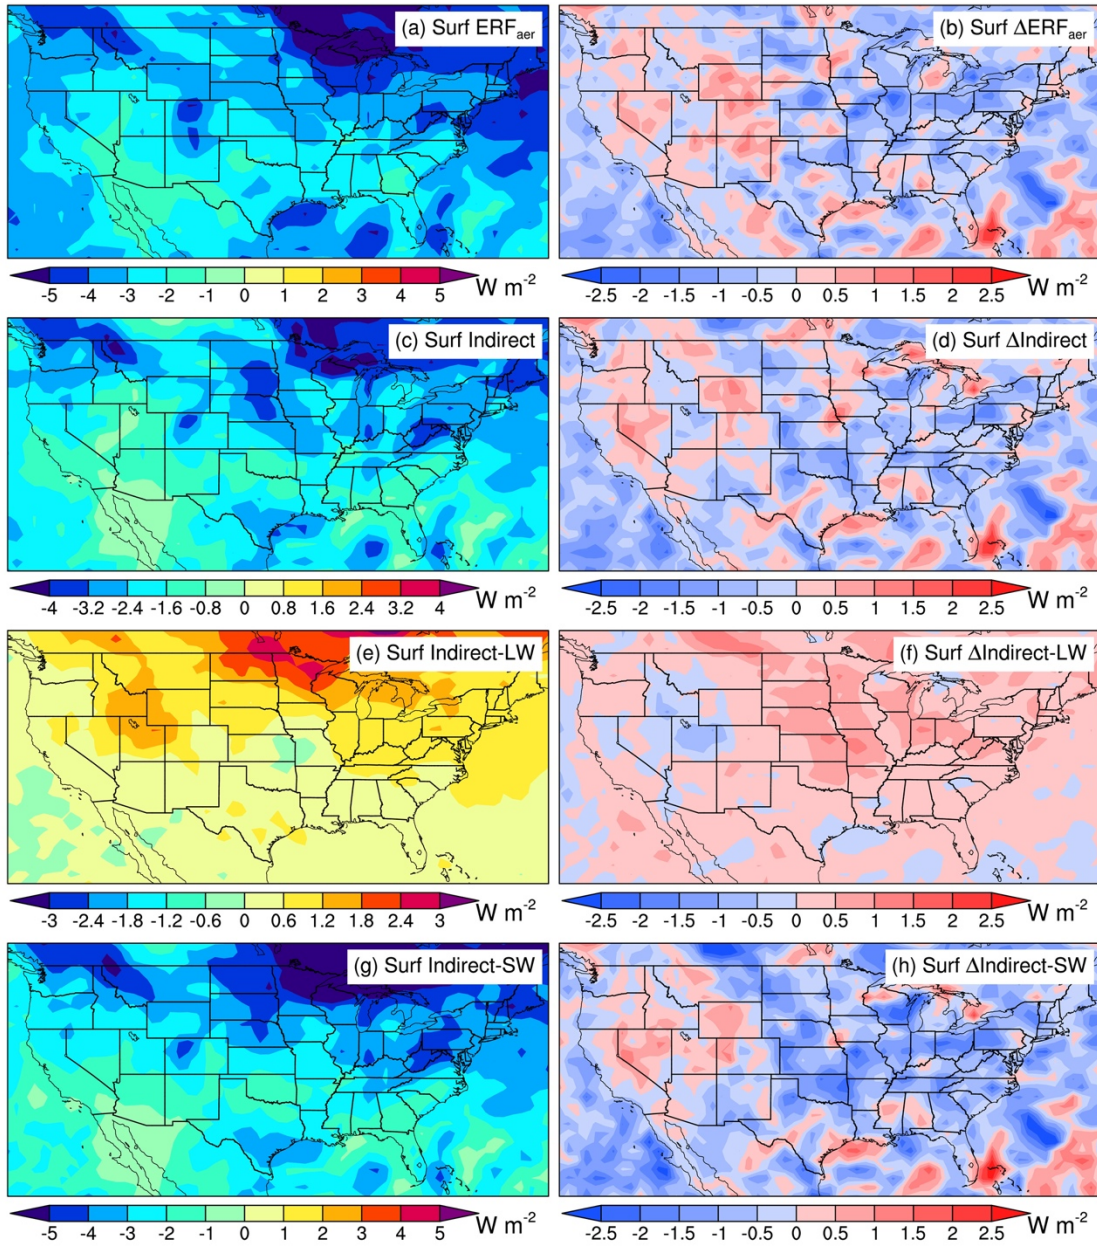

36  
37 Figure S6. Same as Figure 13 but for surface ERF<sub>aer</sub>.
